# Supplementary material for: Evaluation of a Partector Pro for atmospheric size distribution and number concentration measurements at an urban background site
Source: Copernicus journal article supplement (doi:10.5194/ar-2023-10), 2023-08-21
Supplement: Supplementary file 1 [file ar-2023-10-supplement.pdf]

## **Evaluation of a Partector Pro for atmospheric size distribution and number concentration measurements at an urban background site**

Christof Asbach<sup>1</sup>, Ana Maria Todea<sup>1</sup>, Heinz Kaminski<sup>1</sup>

555 <sup>1</sup> Filtration & Aerosol Research Department, Institut für Umwelt & Energie, Technik & Analytik e. V. (IUTA), 47229  
Duisburg, Germany

*Correspondence to:* Christof Asbach (asbach@iuta.de)

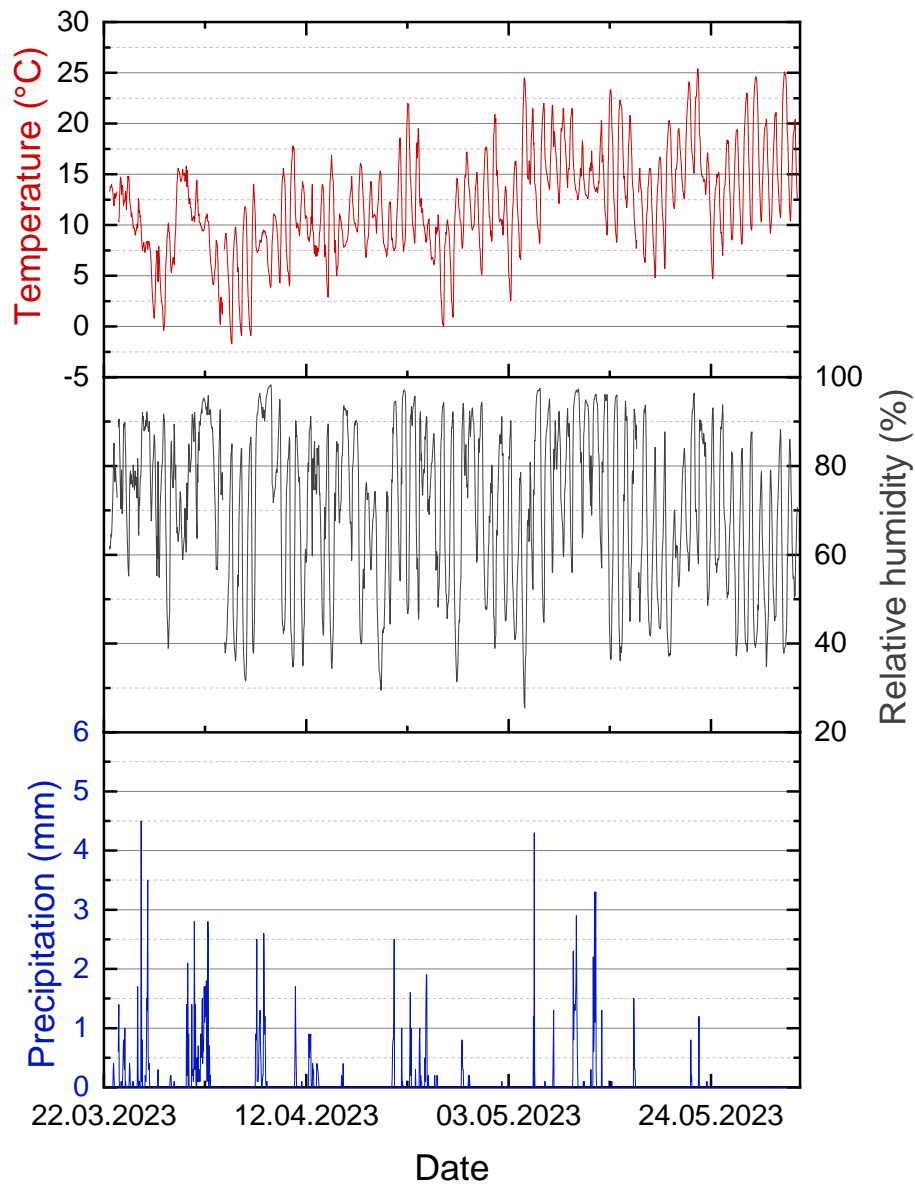

560

Figure S 1: Temperature, relative humidity and precipitation during the measurement period (data courtesy of LANUV: <https://www.lanuv.nrw.de/umwelt/luft/immissionen/aktuelle-luftqualitaet/wetterdaten>)

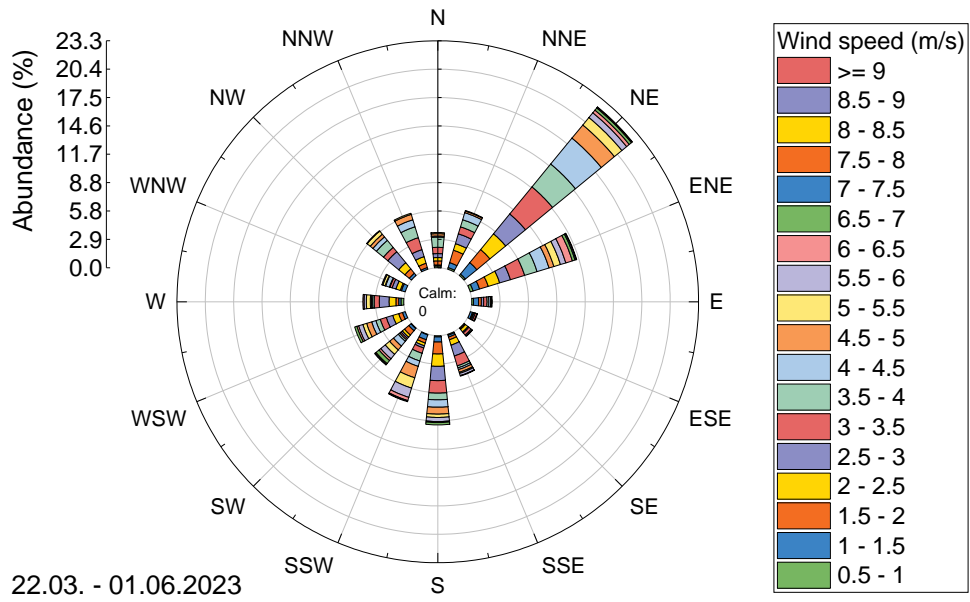

565 **Figure S 2: Wind rose at the measurement station Mülheim-Styrum during the measurement period (data courtesy of LANUV: <https://www.lanuv.nrw.de/umwelt/luft/immissionen/aktuelle-luftqualitaet/wetterdaten>)**

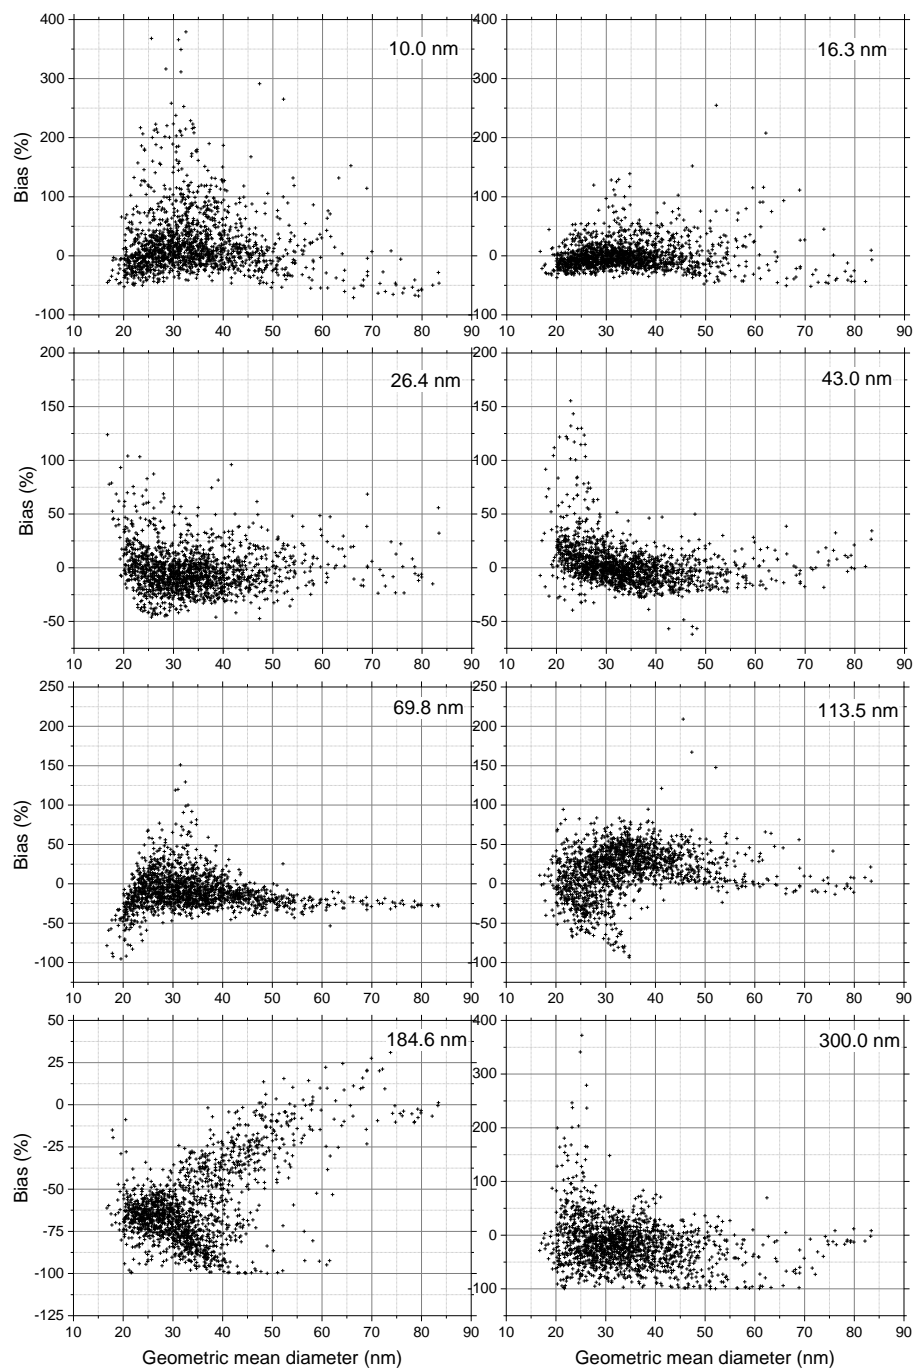

**Figure S 3: Bias of the hourly average concentrations measured by the eight individual size bins of the Partector as a function of the geometric mean diameter, measured with the MPSS**

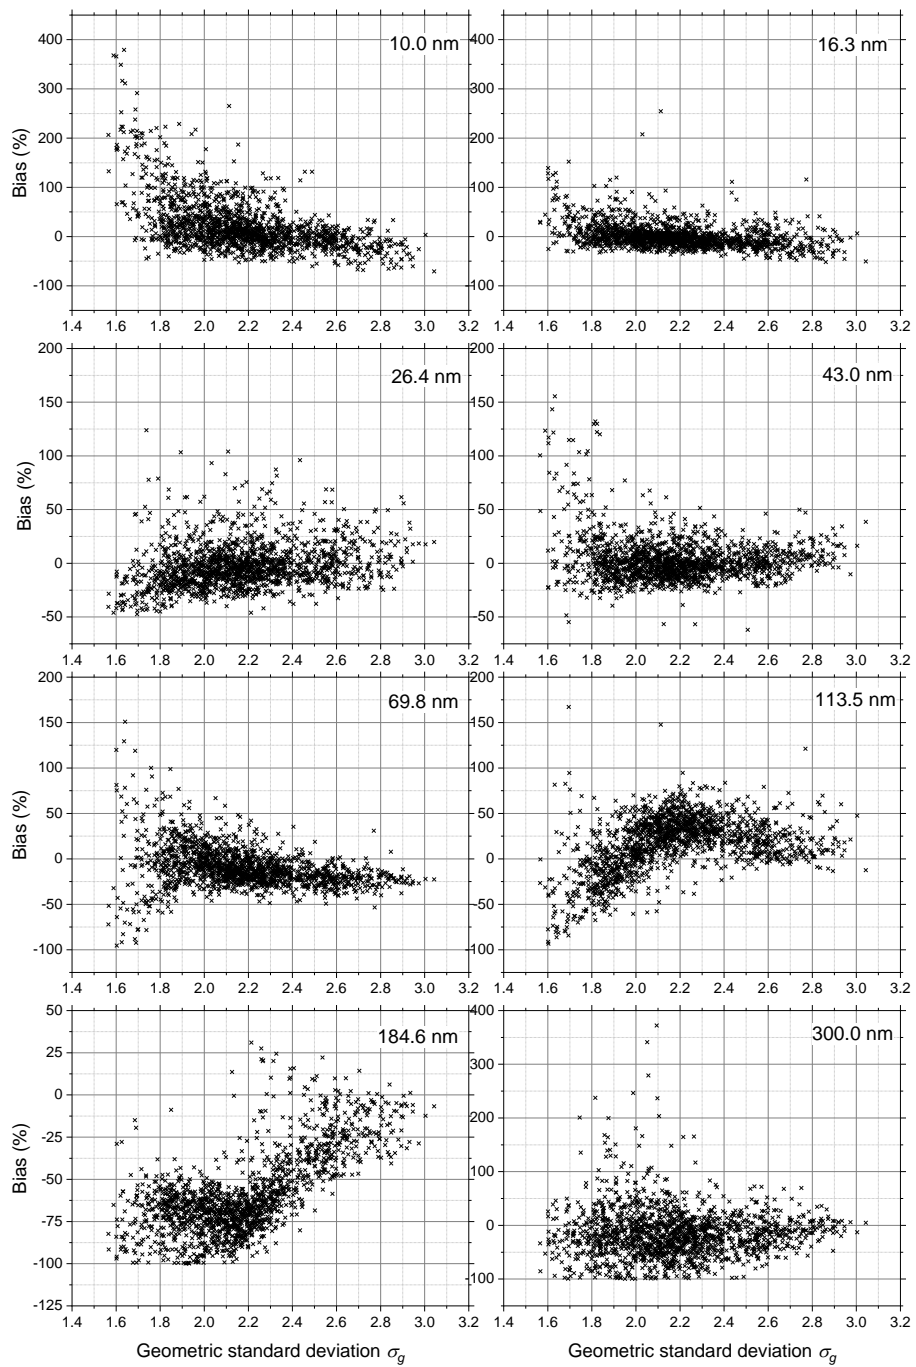

570

**Figure S 4: Bias of the hourly average concentrations measured by the eight individual size bins of the Partector as a function of the geometric standard deviation, measured with the MPSS**

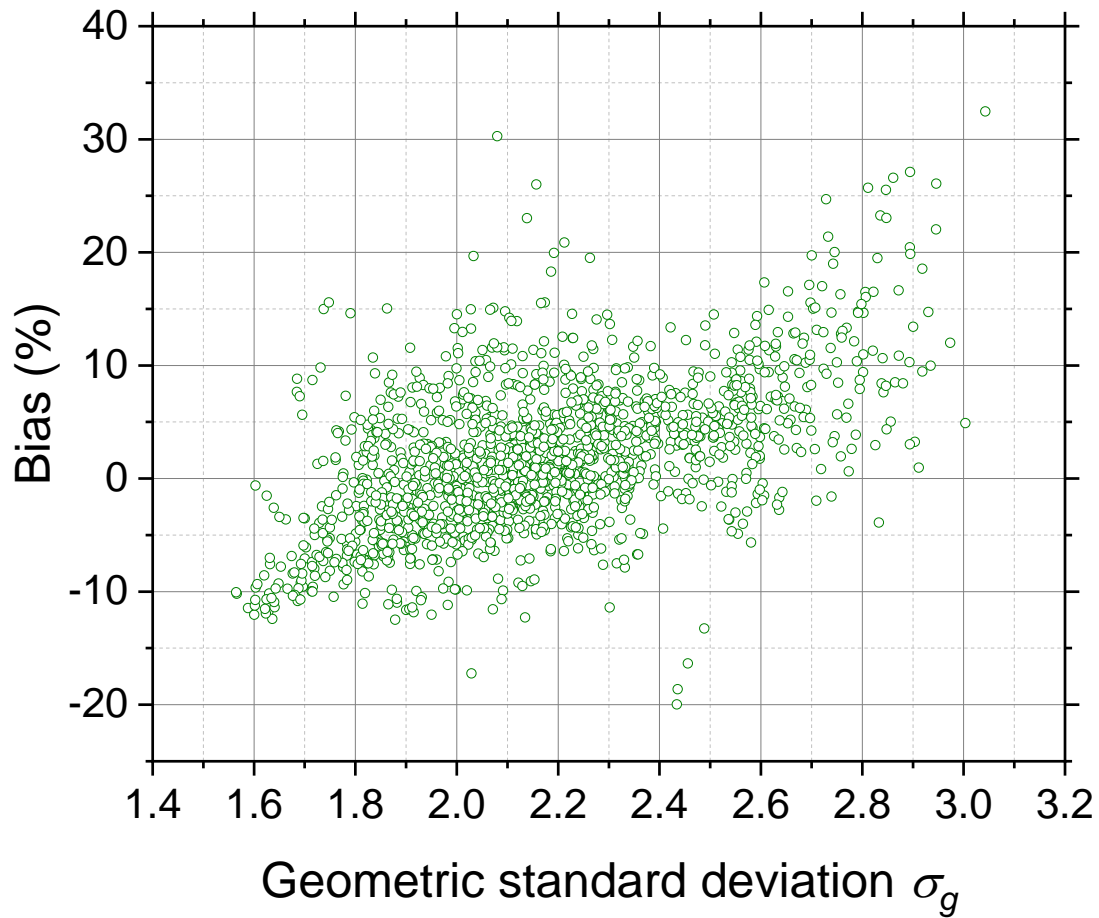

575 **Figure S 5: Bias of the hourly average geometric mean particle size, determined by the Partector Pro as a function of the geometric standard deviation of the aerosol, determined by the MPSS**
